# Supplementary material for: Cardiopulmonary Exercise Testing in Patients with Heart Failure: Impact of Gender in Predictive Value for Heart Transplantation Listing
Source: MDPI journal article supplement (doi:10.3390/life13101985), 2023-09-29
Supplement: s1 [file s1]

### 36-month follow-up

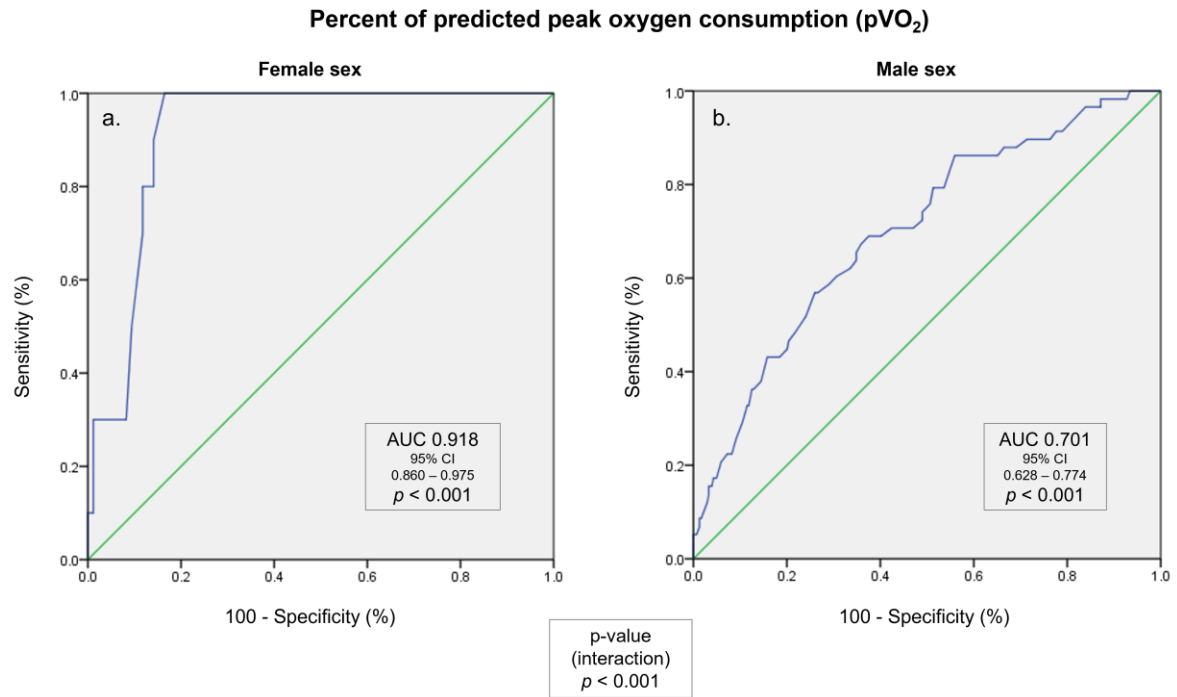

Figure S1: ROC curves for the composite endpoint in a 36-month follow up. (a) Percent of predicted peak oxygen consumption (pVO<sub>2</sub>) in female patients. (b) Percent of predicted pVO<sub>2</sub> in male patients.

## Female and male sex

### Percent of predicted peak oxygen consumption ( $pVO_2$ )

#### a. Kaplan-Meier analysis of time to composite endpoint

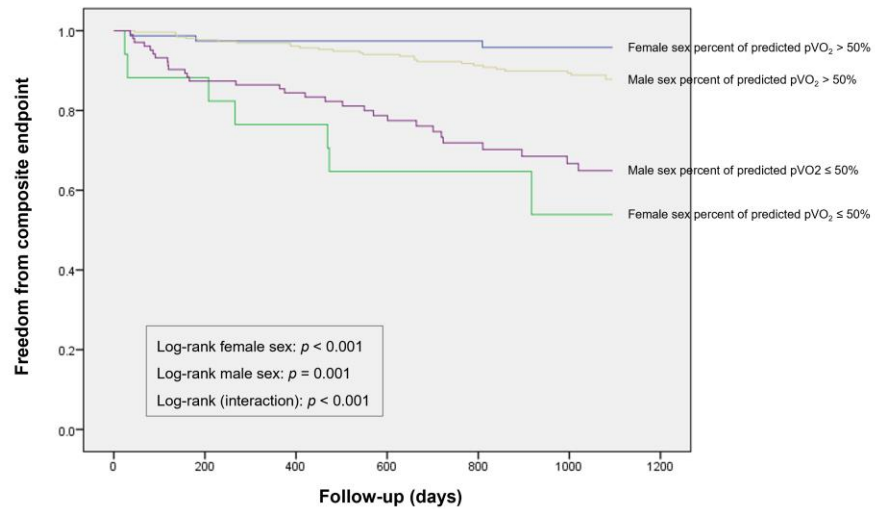

No. at risk

|                                                   |     |     |     |     |     |     |     |
|---------------------------------------------------|-----|-----|-----|-----|-----|-----|-----|
| Female sex percent of predicted $pVO_2 \leq 50\%$ | 17  | 15  | 13  | 11  | 11  | 10  | 10  |
| Female sex percent of predicted $pVO_2 > 50\%$    | 78  | 76  | 76  | 76  | 76  | 75  | 75  |
| Male sex percent of predicted $pVO_2 \leq 50\%$   | 103 | 90  | 87  | 82  | 77  | 74  | 73  |
| Male sex percent of predicted $pVO_2 > 50\%$      | 260 | 254 | 250 | 245 | 239 | 235 | 232 |

## Female and male sex

### Percent of predicted peak oxygen consumption ( $pVO_2$ )

#### b. Kaplan-Meier analysis of time to composite endpoint

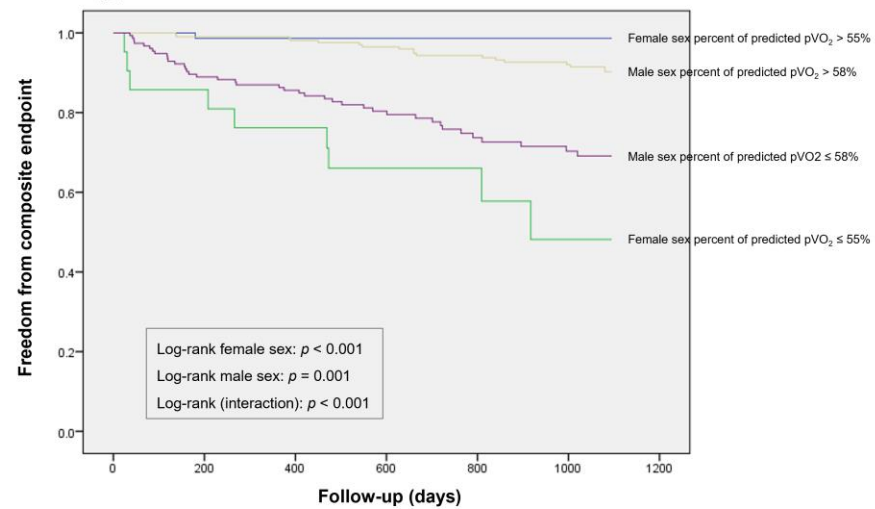

No. at risk

|                                                   |     |     |     |     |     |     |     |
|---------------------------------------------------|-----|-----|-----|-----|-----|-----|-----|
| Female sex percent of predicted $pVO_2 \leq 55\%$ | 21  | 18  | 16  | 14  | 14  | 12  | 12  |
| Female sex percent of predicted $pVO_2 > 55\%$    | 74  | 73  | 73  | 73  | 73  | 73  | 73  |
| Male sex percent of predicted $pVO_2 \leq 58\%$   | 154 | 137 | 132 | 125 | 118 | 115 | 114 |
| Male sex percent of predicted $pVO_2 > 58\%$      | 209 | 207 | 205 | 202 | 198 | 194 | 191 |

Figure S2: Survival analysis for the composite endpoint in female patients and male patients according to (a) the International Society for Heart and Lung Transplantation (ISHLT) thresholds of percent of predicted peak  $O_2$  consumption ( $pVO_2$ )  $\leq 50\%$  and (b) thresholds of percent of predicted  $pVO_2 \leq 55\%$  in females and percent of predicted  $pVO_2 \leq 58\%$  in males.
